# Supplementary material
Source: PubMed Central journal article supplement (PMC9295546)
Supplement: aac.00322-22-s0002.pdf [file aac.00322-22-s0002.pdf]

Figure S1 – BDQ MIC for all isolates

BDQ MIC using the CRyPTIC (UKMYC6) plates for all isolates for which phenotypic data was available.

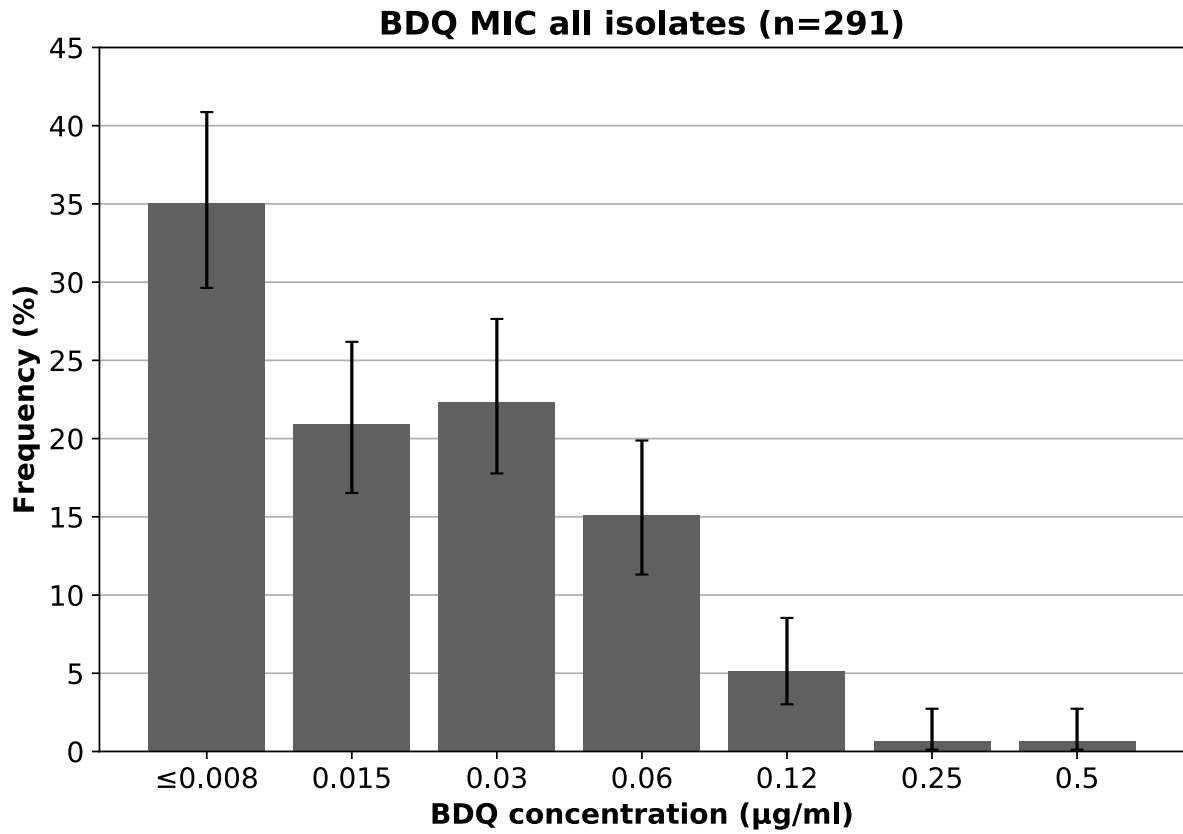

Figure S2 – BDQ MIC for individual mutations

Observed BDQ MIC values for each mutation in the dataset for which phenotypic data was available. MIC reading was done after two weeks of incubation.

# Synonymous SNPs

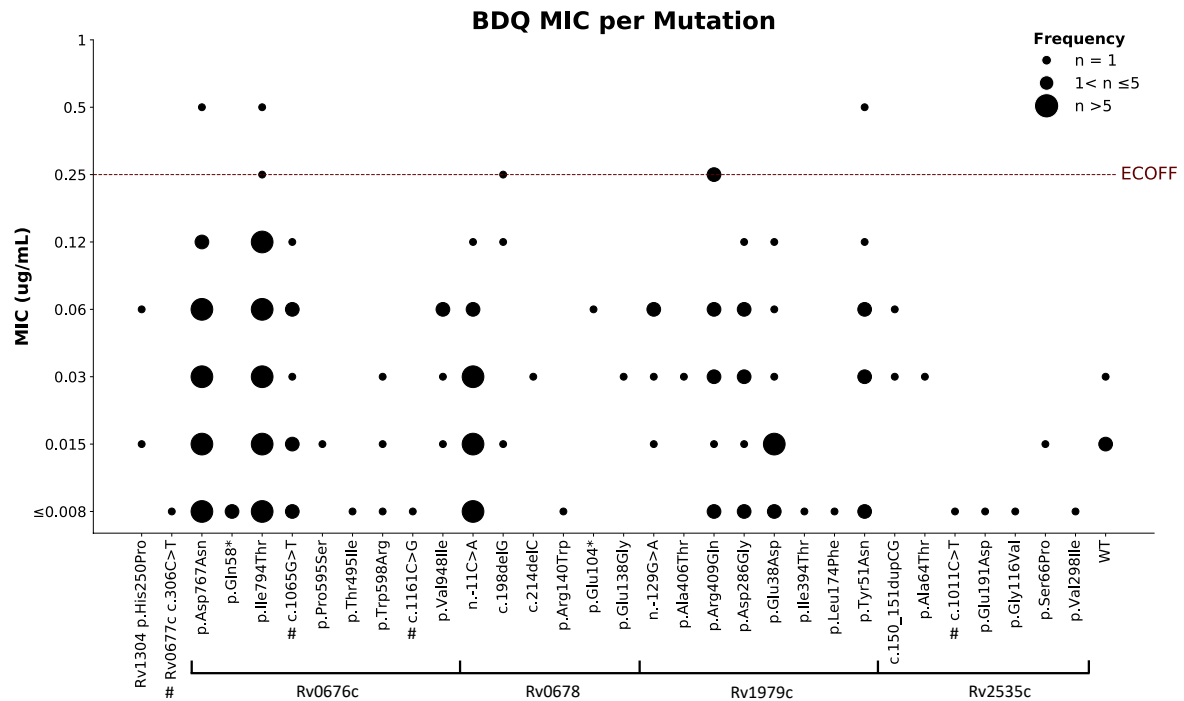



Figure S4: Sensitivity analysis – BDQ MIC for individual mutations  
 Observed BDQ MIC values for each mutation in the dataset for which phenotypic data was available. MIC reading was done after two weeks of incubation.

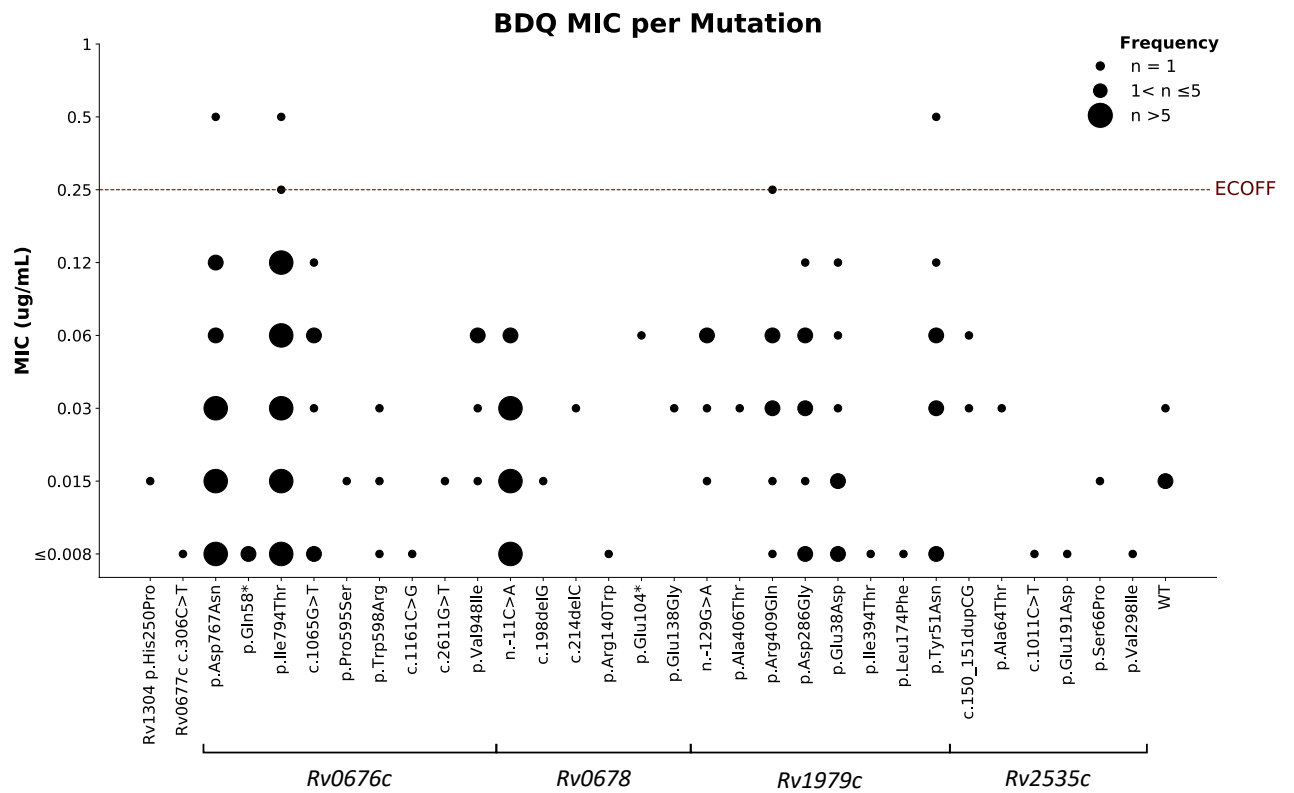

## Figure S5: Sensitivity analysis – BDQ MIC per lineage

(A) BDQ MIC using the CRyPTIC (UKMYC6) plates for lineage 1 isolates. (B) BDQ MIC using the CRyPTIC (UKMYC6) plates for lineage 2 isolates. (C) BDQ MIC using the CRyPTIC (UKMYC6) plates for lineage 3 isolates. (D) BDQ MIC using the CRyPTIC (UKMYC6) plates for lineage 4 isolates. (E) BDQ MIC using the CRyPTIC (UKMYC6) plates for all isolates. (F) Kernel density estimation (KDE) of BDQ MIC of lineage 1, 2 and 4 isolates. KDE and corresponding confidence intervals were calculated using the `prop.test` function in the R *stats* package (version 4.0.0). MIC reading was done after two weeks of incubation.

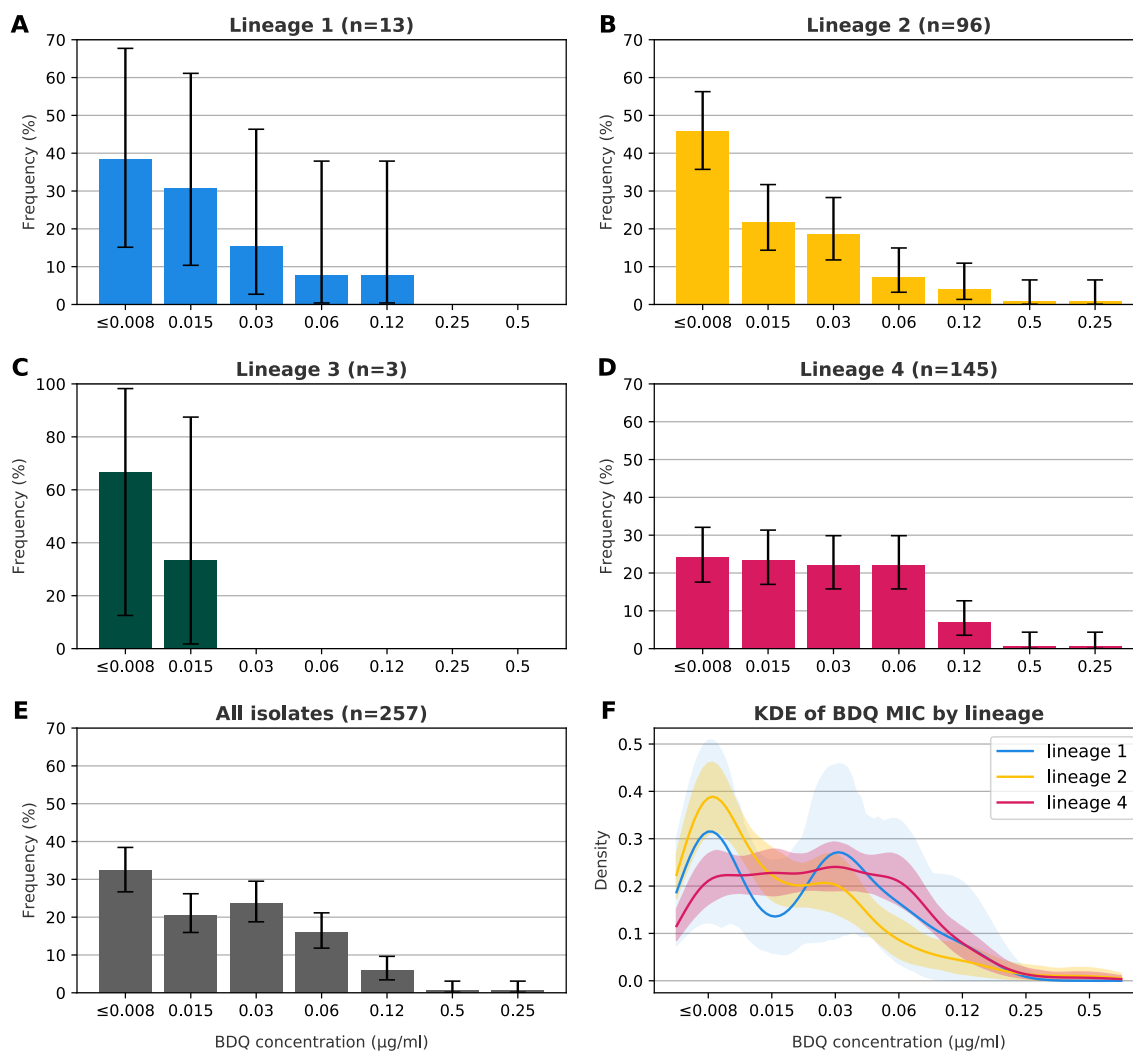

Table S1 – Genomic regions investigated

| <b>Gene</b>           | <b>Region</b> | <b>H37Rv Coordinates</b> |
|-----------------------|---------------|--------------------------|
| <b>Rv1305 (atpE)</b>  | coding        | 1461045 - 1461290        |
|                       | upstream      | 1460895 - 1461044        |
| <b>Rv0678</b>         | coding        | 778990 - 779487          |
|                       | upstream      | 778840 - 778989          |
| <b>Rv2535c (pepQ)</b> | coding        | 2859300 - 2860418        |
|                       | upstream      | 2860419 - 2860569        |
| <b>Rv1979c</b>        | coding        | 2221719 - 2223165        |
|                       | upstream      | 2223164 - 2223315        |
| <b>Rv0676c</b>        | coding        | 775586 - 778481          |
|                       | upstream      | NA                       |
| <b>Rv0677c</b>        | coding        | 778477 - 778906          |
|                       | upstream      | 778907 - 779056          |

Genomic regions that were investigated for mutations in the samples in the dataset. No upstream region for Rv0676c is defined as it would overlap with the Rv0677c gene.

## Sensitivity analysis

Of the 509 isolates included in the main analysis, 58 originated from patients who were unconfirmed BDQ naïve. In order to investigate whether inclusion of these 58 mutations biased our analysis and results, we repeated the analysis, leaving out all data on these 58 isolates.

Table S2: Sensitivity analysis – Observed mutations

| Observed baseline mutations        |                      |                        |           |                      |                       |
|------------------------------------|----------------------|------------------------|-----------|----------------------|-----------------------|
| Gene                               | DNA mutation         | Protein Mutation       | Frequency | Oldest sampling year | BDQ MIC range (µg/ml) |
| <i>Rv1304</i><br>( <i>atpB</i> )   | 749A>C               | His250Pro              | 1         | 2012                 | 0.015                 |
| <i>Rv0678</i><br>( <i>mmpR</i> )   | 310G>T               | Glu104*                | 1         | 2011                 | 0.06                  |
|                                    | 198delG              | Ile67fs                | 1         | 2011                 | 0.015                 |
|                                    | -11C>A               | NA                     | 73        | 2003                 | ≤0.008 – 0.06         |
|                                    | 214delC              | Arg72fs                | 1         | 2010                 | 0.03                  |
|                                    | 413A>G               | Glu138Gly              | 1         | 2013                 | 0.03                  |
|                                    | 418C>T               | Arg140Trp              | 1         | 2013                 | ≤0.008                |
| <i>Rv2535c</i><br>( <i>pepQ</i> )  | 150_151dupCG         | Asp51fs                | 2         | 2012                 | 0.03 – 0.06           |
|                                    | 573G>C               | Glu191Asp              | 2         | 2010                 | ≤0.008                |
|                                    | 347G>T               | Gly116Val              | 1         | 2013                 | NA                    |
|                                    | -118A>G              | NA                     | 1         | 2012                 | NA                    |
|                                    | 190G>A               | Ala64Thr               | 1         | 2013                 | 0.03                  |
|                                    | 196T>C               | Ser66Pro               | 1         | 2005                 | 0.015                 |
|                                    | 892G>A               | Val298Ile              | 1         | 2011                 | ≤0.008                |
|                                    | 1011C>T              | Arg337Arg              | 1         | 2015                 | ≤0.008                |
| <i>Rv1979c</i>                     | -129G>A              | NA                     | 4         | 2012                 | 0.015 – 0.06          |
|                                    | 114G>C               | Glu38Asp               | 12        | 2006                 | ≤0.008 – 0.12         |
|                                    | 857A>G               | Asp286Gly              | 21        | 1998                 | ≤0.008 – 0.12         |
|                                    | 151T>A               | Tyr51Asn               | 24        | 2007                 | ≤0.008 – 0.5          |
|                                    | 1226G>A              | Arg409Gln              | 51        | 2010                 | ≤0.008 – 0.25         |
|                                    | 1216G>A              | Ala406Thr              | 1         | 2010                 | 0.03                  |
|                                    | -147G>A              | NA                     | 1         | 2012                 | NA                    |
|                                    | 520C>T               | Leu174Phe              | 1         | 2013                 | ≤0.008                |
|                                    | 1181T>C              | Ile394Thr              | 1         | 2012                 | ≤0.008                |
| <i>Rv0676c</i><br>( <i>mmpL5</i> ) | 172>T                | Gln58*                 | 2         | 2000                 | ≤0.008                |
|                                    | 1792T>A              | Trp598Arg              | 3         | 2012                 | ≤0.008 – 0.03         |
|                                    | 740T>C               | Val247Ala              | 3         | 2012                 | NA                    |
|                                    | 2842G>A <sup>§</sup> | Val948Ile <sup>§</sup> | 5         | NA                   | 0.015 – 0.06          |
|                                    | 1065G>T              | Pro355Pro              | 23        | 2007                 | ≤0.008 – 0.12         |
|                                    | 2299G>A              | Asp767Asn              | 147       | 2003                 | ≤0.008 – 0.5          |
|                                    | 2381T>C              | Ile794Thr              | 225       | 2000                 | ≤0.008 – 0.5          |
|                                    | 1161C>G              | Val387Val              | 1         | 2012                 | ≤0.008                |
|                                    | 1783C>T              | Pro595Ser              | 1         | 2013                 | 0.015                 |
|                                    | 2661G>T              | Val887Val              | 1         | 2012                 | 0.015                 |
| <i>Rv0677c</i><br>( <i>mmpS5</i> ) | 306C>T               | Asn102Asn              | 1         | 2012                 | ≤0.008                |

Table S3: Sensitivity analysis – Proportion of samples with mutated BDQ resistance gene

| Lineage  | Proportion of samples with mutated BDQ resistance gene |                   |                 |                   |                    |                 |
|----------|--------------------------------------------------------|-------------------|-----------------|-------------------|--------------------|-----------------|
|          | Rv1304                                                 | Rv0678            | Rv2535c         | Rv1979c           | Rv0676c            | Rv0677c         |
| <b>1</b> | 0%<br>(0/21)                                           | 4.8%<br>(1/21)    | 0%<br>(0/21)    | 100%<br>(21/21)   | 14.3%<br>(3/21)    | 0%<br>(0/21)    |
| <b>2</b> | 0%<br>(0/198)                                          | 37.9%<br>(75/198) | 1.0%<br>(2/198) | 38.9%<br>(77/198) | 78.0%<br>(147/198) | 0%<br>(0/236)   |
| <b>3</b> | 0%<br>(0/7)                                            | 0%<br>(0/7)       | 0%<br>(0/7)     | 0%<br>(0/7)       | 0%<br>(0/7)        | 0%<br>(0/7)     |
| <b>4</b> | 0.4%<br>(1/225)                                        | 0.4%<br>(1/225)   | 3.6%<br>(8/225) | 7.6%<br>(17/225)  | 100%<br>(225/225)  | 0.4%<br>(1/245) |
